# Supplementary material for: Comparative Analysis of Midgut Regeneration Capacity and Resistance to Oral Infection in Three Disease-Vector Mosquitoes
Source: PubMed Central journal article supplement (PMC6787257; doi:10.1038/s41598-019-50994-4), 2019-10-10
Supplement: 41598_2019_50994_MOESM1_ESM.pdf [file 41598_2019_50994_MOESM1_ESM.pdf]

# **Comparative Analysis of Midgut Regeneration Capacity and Resistance to Oral Infection in Three Disease-Vector Mosquitoes**

**Maria Janeh<sup>1</sup> (msj08@mail.aub.edu), Dani Osman<sup>2</sup> (dani.osman@ul.edu.lb) and Zakaria Kambris<sup>1\*</sup> (zakaria.kambris@aub.edu.lb)**

<sup>1</sup> Biology Department, Faculty of Arts and Sciences, American University of Beirut, Beirut, Lebanon

<sup>2</sup> Faculty of Sciences III and Azm Center for Research in Biotechnology and its Applications, LBA3B, EDST, Lebanese University, 1300, Tripoli, Lebanon

\* for correspondence: zakaria.kambris@aub.edu.lb

Supplementary Material

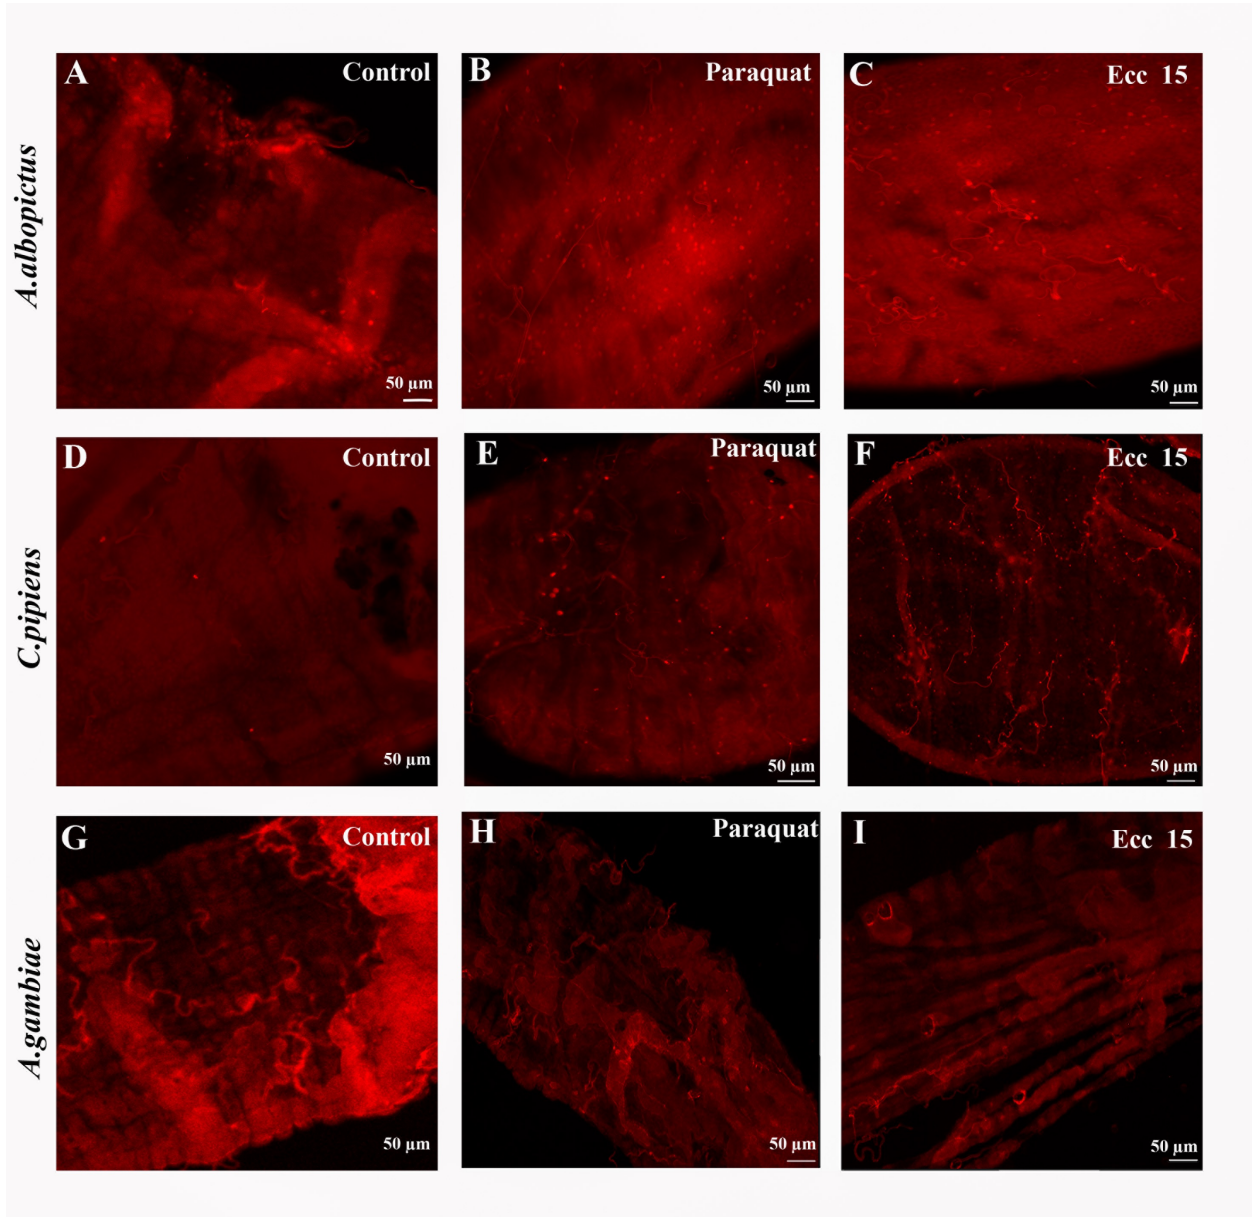

Figure S1

**Figure S1: Immunohistochemistry staining reveals the presence of regenerative cells at the level of *A. albopictus* and *C. pipiens* mosquito guts**

Feeding *A. albopictus*, *C. pipiens* and *A. gambiae* mosquitoes sucrose solutions supplemented with paraquat or *Ecc 15* confirm the results obtained with SDS and *S. marcescens* feeding. Immunohistochemistry staining using anti-PH3 antibodies reveals the presence of regenerative cells at the level of *A. albopictus* mosquito guts fed sucrose solutions supplemented with paraquat (S1B) or with *Ecc 15* (S1C) as compared to control sucrose fed mosquito guts (S1A).. The same results are observed with *C. pipiens* mosquito guts fed sucrose solutions supplemented with paraquat (S1E) and *Ecc 15* (S1F) when compared to the control sucrose fed mosquito guts (S1D). Staining using the anti-PH3 antibody does not reveal the presence of regenerative cells at the level of control *A. gambiae* guts (S1G), paraquat fed mosquito guts (S1H), or *Ecc 15* fed mosquito guts (S1I).

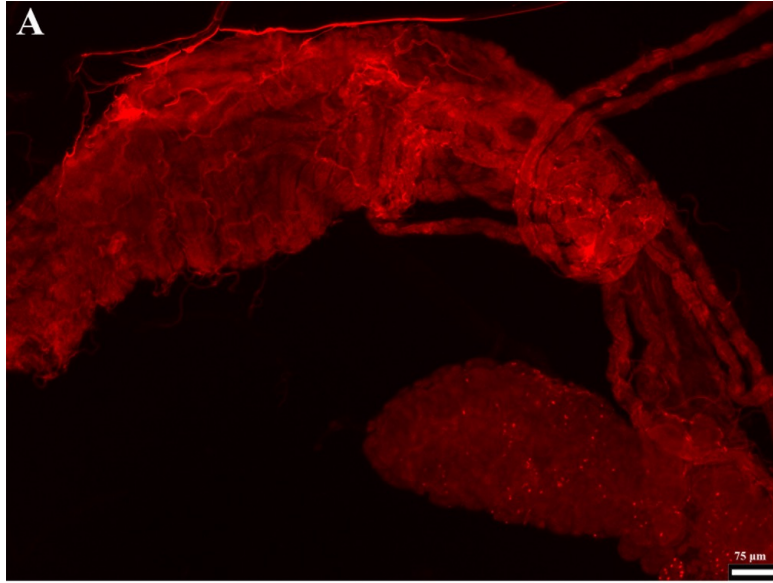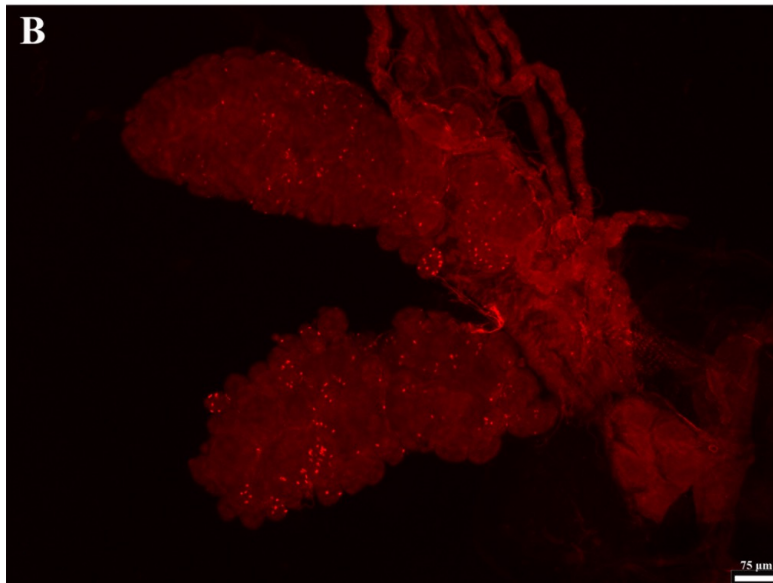

**Figure S2**

**Figure S2: Detection of mitotic cells at the level of *A. gambiae* ovaries using anti-PH3 antibodies**

Immunohistostaining of *A. gambiae* guts and ovaries using anti-PH3 (S2A) reveals the presence of regenerative cells at the level of ovaries confirming that these antibodies are functional in this species but not detecting any cells at the level of the guts. Figure S2B shows a magnification of a pair of *A. gambiae* ovaries stained with the anti-PH3 antibodies.

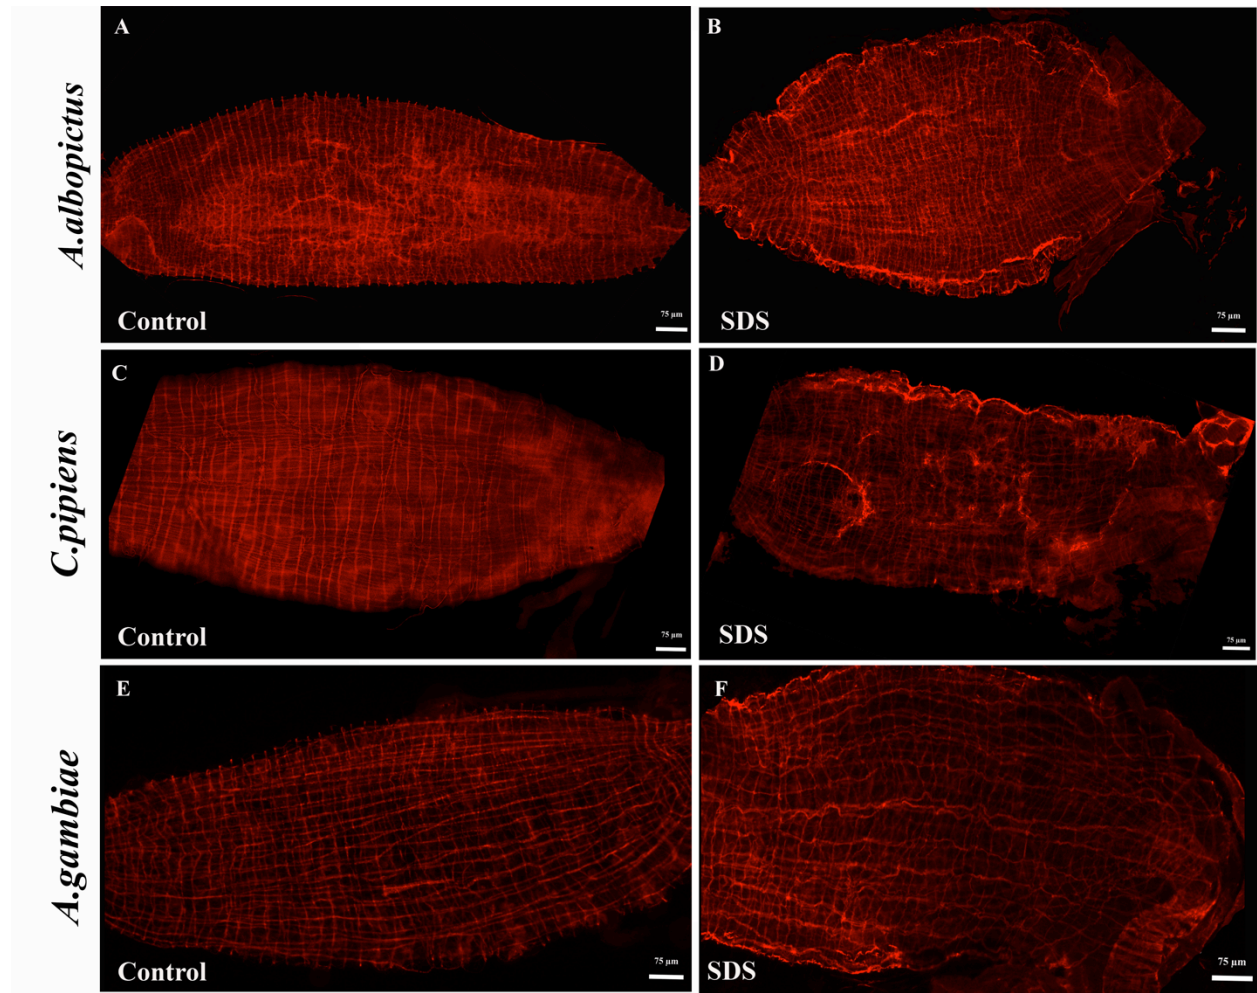

Figure S3

**Figure S3: SDS feeding affects the gut morphology in three mosquito species**

Phalloidin staining of dissected guts shows that the guts of mosquitoes fed for 24 hours on sucrose supplemented with 2% SDS have an altered morphology (S3B, S3D and S3F) as compared to controls fed on sucrose (S3A, S3C and S3E). Phalloidin coupled to Alexa Fluor® 647, and was added for one hour at room temperature (1:500 in PBS-Triton 0.1%-BSA 1%).

**A**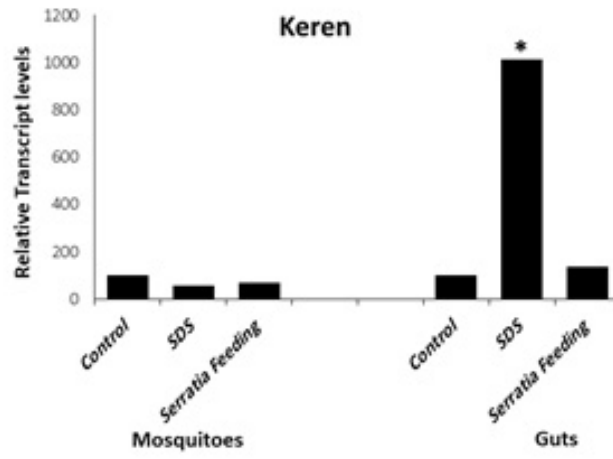**B**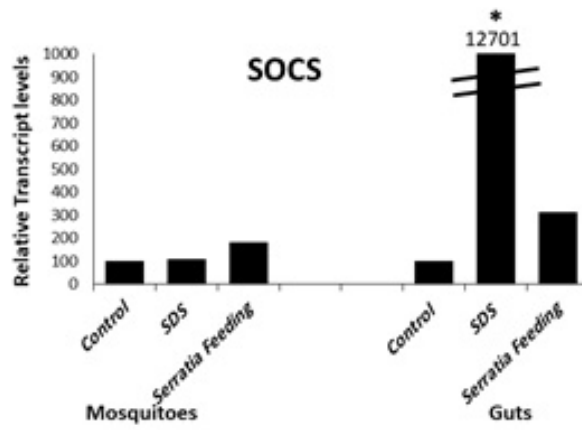

Figure S4



**Figure S4: Relative transcription levels of Keren and SOCS36E genes in *A. gambiae* after SDS or *S. marcescens* feeding**

Feeding *A.gambiae* mosquitoes on 2% SDS-sucrose solution leads to a significant increase in the transcription of both Keren and SOCS36E genes in the gut (\*P<0.05) but not in the whole mosquito as revealed by real time PCR. *S. marcescens* oral infection did not lead to statistically significant results. Real-time PCR was performed on BIORAD thermocycler (CFX 96 Real-time System, C1000). Ct values for target genes were normalized to Rps7 and compared to controls using the delta Ct method. Three independent experiments were averaged and unpaired t tests were performed.

Primers used were as follow:

Socs Forward: 5'-GTTTTCCGTCTCCTTCCGCAAGTA-3'

Socs Reverse: 5'-CTTCGGTAGCGTCAGCTCGTTGAT-3'

Keren Forward: 5'-CTCGTCCTCCCAGTCCTACA-3'

Keren Reverse: 5'-TCGAACAAAACCAGGGTCTGA-3'

Rps7 Forward: 5'-TTCAACAACAAGAAGGCGATCA-3'

Rps7 Reverse: 5'-CTTGTACACCGACGAAAAGTG-3'
